# Supplementary material for: Conversion of wheat straw into formic acid in NaVO3–H2SO4aqueous solution with molecular oxygen
Source: Royal Society of Chemistry journal article supplement (doi:10.1039/c4gc01440e), 2014-09-12
Supplement: c4gc01440e1.pdf [file c4gc01440e1.pdf]

## Supplementary Information

### Conversion of Wheat Straw into Formic Acid in NaVO<sub>3</sub>/H<sub>2</sub>SO<sub>4</sub> Aqueous Solution with Molecular Oxygen

Muge Niu,<sup>a</sup> Yucui Hou,<sup>b</sup> Shuhang Ren,<sup>a</sup> Weize Wu<sup>\*a</sup> and Kenneth N. Marsh<sup>\*c</sup>

<sup>a</sup> State Key Laboratory of Chemical Resource Engineering, Beijing University of Chemical Technology, 100029, Beijing, China. Fax/Tel: 86 10 64427603; E-mail: wzwu@mail.buct.edu.cn

<sup>b</sup> Department of Chemistry, Taiyuan Normal University, 030031, Taiyuan, China.

<sup>c</sup> Center for Energy, School of Mechanical and Chemical Engineering, The University of Western Australia, Crawley WA 6009, Australia. E-mail: ken.marsh@uwa.edu.au

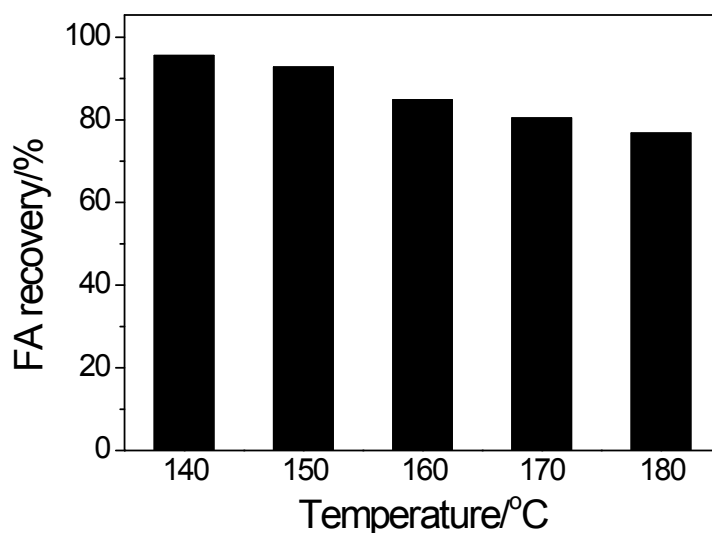

**Fig. S1** The FA recovery in the catalytic system at different temperatures. Conditions: FA, 0.05 g; H<sub>2</sub>SO<sub>4</sub>, mass fraction  $w = 2\%$ ; NaVO<sub>3</sub>,  $w = 0.35\%$ ; H<sub>2</sub>O, 6.0 cm<sup>3</sup>; O<sub>2</sub>, 3 MPa; time, 5 min.

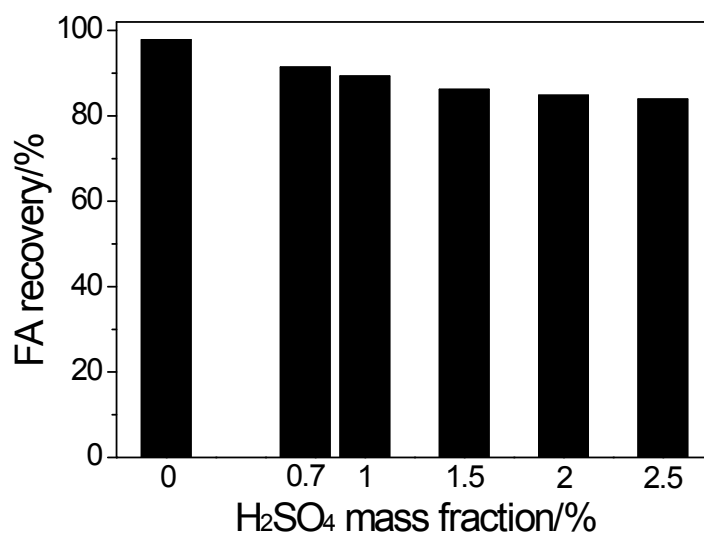

**Fig. S2** The FA recovery in the catalytic system at different H<sub>2</sub>SO<sub>4</sub> mass fractions. Conditions: FA, 0.05 g; NaVO<sub>3</sub>, *w* = 0.35 %; H<sub>2</sub>O, 6.0 cm<sup>3</sup>; O<sub>2</sub>, 3 MPa; temperature, 160 °C; time, 5 min.

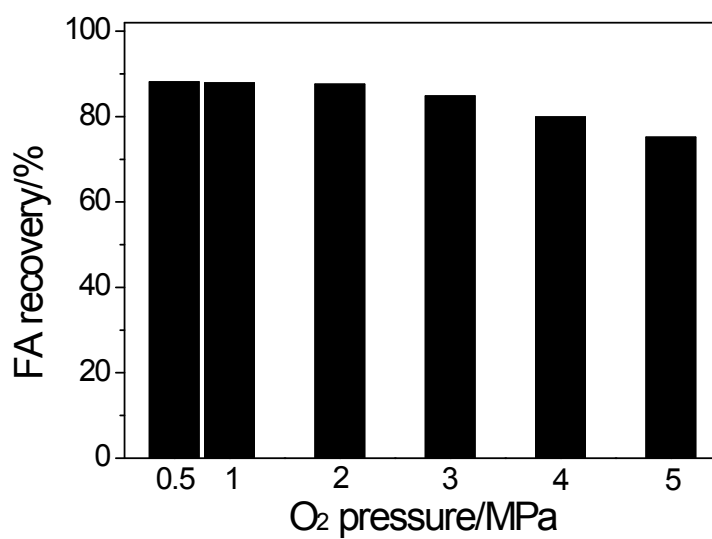

**Fig. S3** The FA recovery in catalytic system at different O<sub>2</sub> pressures. Conditions: FA, 0.05 g; H<sub>2</sub>SO<sub>4</sub>, *w* = 2 %; NaVO<sub>3</sub>, *w* = 0.35 %; H<sub>2</sub>O, 6.0 cm<sup>3</sup>; temperature, 160 °C; time, 5 min.
